# Supplementary material for: Network Topologies and Dynamics Leading to Endotoxin Tolerance and Priming in Innate Immune Cells
Source: PLOS journal article supplement (doi:10.1371/journal.pcbi.1002526), 2012-05-17
Supplement: S2 (10.1371/journal.pcbi.1002526.s002) [file journal.pcbi.1002526.s002]

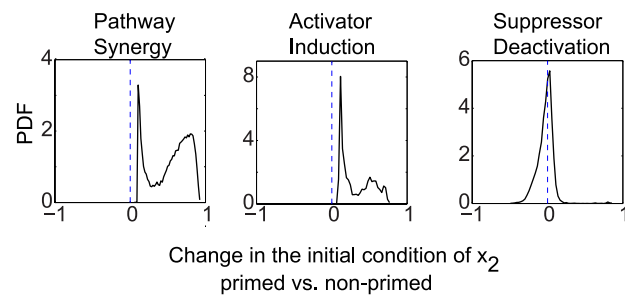

**Figure S2.** Distribution of change in  $x_2$ 's initial condition prior to HD without or without priming treatment. Both PS and AI show considerable increase in  $x_2$  in the primed system. PDF: probability distribution function.
