# Supplementary material for: Network Topologies and Dynamics Leading to Endotoxin Tolerance and Priming in Innate Immune Cells
Source: PLOS journal article supplement (doi:10.1371/journal.pcbi.1002526), 2012-05-17
Supplement: S6 (10.1371/journal.pcbi.1002526.s006) [file journal.pcbi.1002526.s006]

### Sort topologies by density

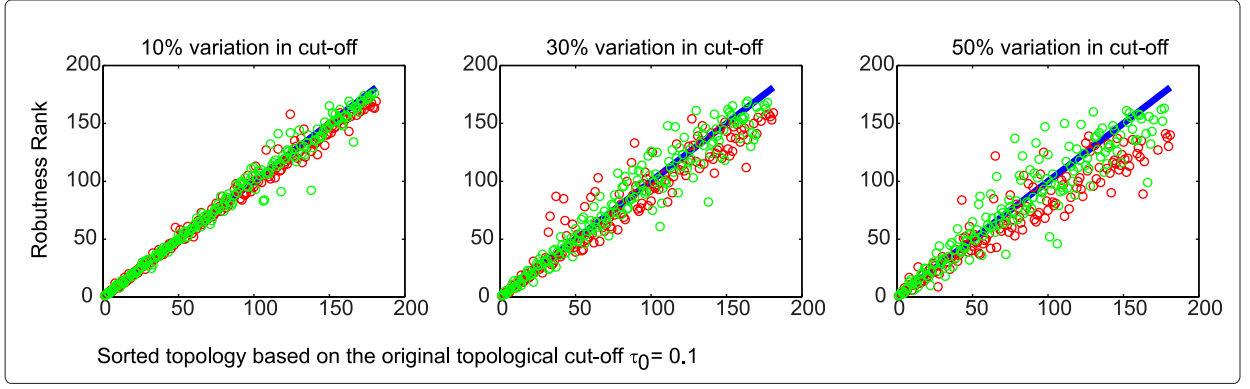

### Sort topologies by frequency

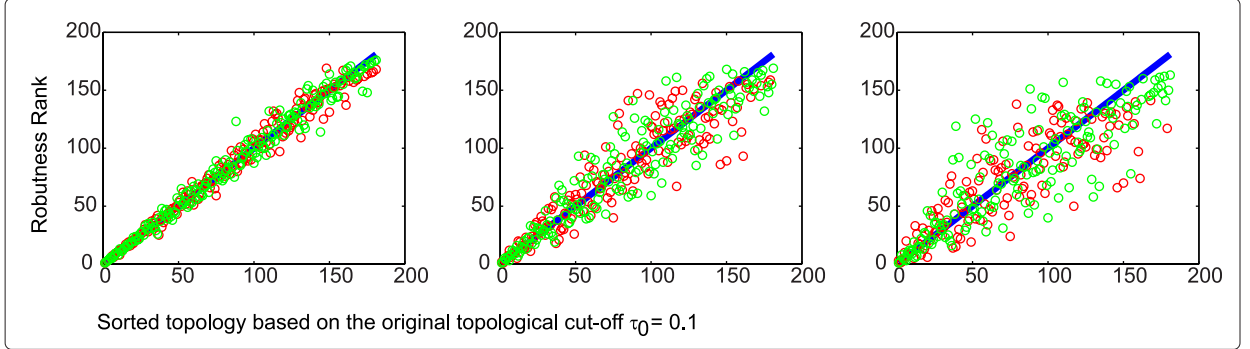

**Figure S6.** Change in the robustness rank as a result of variations in the topology cut-off. SD datasets are used as an example. The robustness rank is calculated based on density (top panel) or sample frequency (lower panel) of the unique topologies. Changes in the robustness rank is compared with 10% (left column), 30% (center column), and 50% (right column) variation in the topology cut-off  $\tau_0 = 0.1$ .
