# Supplementary material for: Network Topologies and Dynamics Leading to Endotoxin Tolerance and Priming in Innate Immune Cells
Source: PLOS journal article supplement (doi:10.1371/journal.pcbi.1002526), 2012-05-17
Supplement: S9 (10.1371/journal.pcbi.1002526.s009) [file journal.pcbi.1002526.s009]

**Table S1.** Criteria identifying priming and tolerance for a given parameter set  $x$ .

| <b>A Good set of</b> | <b>Single LD</b>                     | <b>Single HD</b>                     | <b>LD+HD</b>                                                                         | <b>HD+HD</b>                                                                          |
|----------------------|--------------------------------------|--------------------------------------|--------------------------------------------------------------------------------------|---------------------------------------------------------------------------------------|
| <b>Priming</b>       | $R_{LD}(x) < \delta_{LD}$            | $R_{HD}(x) \geq \delta_{HD}$         | $R_{LD+HD}(x)/R_{HD}(x) \geq \lambda$                                                | -                                                                                     |
| <b>Tolerance</b>     | $R_{LD}(x) < \delta_{LD}$            | $R_{HD}(x) \geq \delta_{HD}$         | -                                                                                    | $R_{HD}(x)/R_{HD+HD}(x) \geq \lambda$                                                 |
| <b>Description</b>   | LD signal stimulates small response. | HD signal stimulates large response. | Two sequential signals (LD followed by HD) gives a larger response than a single HD. | Two sequential signals (HD followed by HD) gives a smaller response than a single HD. |

$R$  denotes the maximum response of “cytokine”  $x_3$  under a specific stimulation protocol. LD: low dose; HD: high dose; LD+HD: LD followed by HD with maximum response measured in the HD period; HD+HD: HD followed by HD with maximum response measured in the second HD period.  $\delta_{LD}$  and  $\delta_{HD}$  denote the threshold of response under LD and HD, respectively.  $\lambda > 1$  is the threshold of fold-change in the maximum response. The values we have chosen for these parameters (LD=0.1, HD=1,  $\delta_{LD}=\delta_{HD}=0.3$ ,  $\lambda=1.5$ ) are in qualitative agreement with experimental observations.
