# Supplementary material for: Network Topologies and Dynamics Leading to Endotoxin Tolerance and Priming in Innate Immune Cells
Source: PLOS journal article supplement (doi:10.1371/journal.pcbi.1002526), 2012-05-17
Supplement: S12 (10.1371/journal.pcbi.1002526.s012) [file journal.pcbi.1002526.s012]

301 Moved Permanently

# Moved Permanently

The document has moved here.

---

Apache Server at www.ploscompbiol.org Port 80
