# Supplementary material for: Network Topologies and Dynamics Leading to Endotoxin Tolerance and Priming in Innate Immune Cells
Source: PLOS journal article supplement (doi:10.1371/journal.pcbi.1002526), 2012-05-17
Supplement: S12 (10.1371/journal.pcbi.1002526.s012) [file journal.pcbi.1002526.s012]

# Supporting Information

## Network Topologies and Dynamics Leading to Endotoxin Tolerance and Priming in Innate Immune Cells

### Table of Contents

#### Supporting text (Text S1):

1. Detailed criteria for priming and tolerance in the Metropolis searching algorithm.
2. Two-stage Metropolis search for parameter sets that exhibit priming or tolerance.
3. Statistical method used to identify backbone motifs.
4. Motif density is more robust than frequency to variation in the topological cut-off.
5. 2D parameter correlations demonstrate how parameter compensation affects topological robustness.

#### Supporting figures:

1. **Figure S1.** Illustration of the two-stage Metropolis search procedure.
2. **Figure S2.** Distribution of changes in the initial condition of  $x_2$  between primed and non-primed system.
3. **Figure S3.** Statistical method used to identify backbone motifs from priming and tolerance data.
4. **Figure S4.** Parameter correlations highlight the backbone motifs of each priming mechanism.
5. **Figure S5.** Typical time course and corresponding trajectory in the phase space.
6. **Figure S6.** Change in the robustness rank as a result of variations in the topology cut-off.
7. **Figure S7.** Topologies of the PS and AI mechanisms.
8. **Figure S8.** Parameter correlation and compensation affects the robustness of the model.

#### Supporting tables:

1. **Table S1.** Criteria identifying priming and tolerance for a given parameter set  $x$ .
2. **Table S2.** Parameter sets used to generate time course and phase-space trajectory in Figure 3 and Figure S5.
3. **Table S3.** Experimental literature supporting the network details in Figure 8.

## Detailed criteria for priming and tolerance in the Metropolis searching algorithm

We used the Metropolis algorithm [1] to search for parameter values for which the system exhibits priming or tolerance effects. Table S1 gives the criteria for identifying priming or tolerance parameter sets. In general, both priming and tolerance require the system to generate a dose-response curve having the following qualitative features: small signal (LD) gives small response and large signal (HD) gives large response; priming requires that LD+HD LPS gives a larger response than does a single HD LPS (positive control); tolerance requires that HD+HD LPS gives lower response than does a single HD LPS (positive control). Parameter sets that satisfy these conditions (either for priming or for tolerance) are called “good” sets.

## Two-stage Metropolis search for parameter sets that exhibit priming or tolerance

It is impractical to perform a brute force search for priming/tolerance samples in a high dimensional parameter space. Figure S1A illustrates an alternative two-stage strategy. In the first stage, we searched widely over the parameter space with some bias to stay in a good parameter region and some chance to wander off in search of another good region. Then K-means Clustering and Principal Component Analysis was applied to the samples of good parameter sets generated in stage 1 to see if the data form several separate clusters. Each potential cluster provides a random seed for a second round of Metropolis searching. This time the search is restricted to stay within a good region, in order to search each region thoroughly and to obtain a representative sample of good parameter sets.

To apply the Metropolis Algorithm, we relate the current problem of searching in the parameter space to sampling the partition function of a pseudo-statistical physics system. The bias controlling the probability of wandering out of a good region ( $\Omega_k = 0$ ,  $\Omega_{k+1} = 1$ ) is defined by a Boltzmann-type expression  $\rho = e^{-\beta(\Omega_{k+1}-\Omega_k)}$  where  $\beta$  represents an “inverse temperature” variable. There exists a trade-off value of  $\beta$  for the Metropolis search in stage I. If  $\beta$  is too large, the search will stay in a local minimum and fail to explore the parameter space thoroughly. If  $\beta$  is too small, the search cannot yield enough samples for the clustering analysis. Through trial and error, we found that  $\beta = 6$  is a good value for the stage I Metropolis search, which gives  $\rho = 0.0025$ . Note that the priming region is very small compared to the whole parameter space. Therefore, although  $\rho = 0.0025$  is very small, it still guarantees that the system has sufficient probability to leave the good regions and thoroughly search the parameter space.

In the above procedure, the score function  $\Omega_k$  plays the role of “energy” in a physical system. In general it can be a continuous function, and its gradient can guide the Metropolis search to the favorable region. For the current problem, the score function we use essentially behaves as a two-state system. Therefore we assign the value of  $\Omega_k$  to be 0 or 1.

We chose to use the Metropolis method for the first stage, but other methods will probably work equally well, e.g. genetic algorithm [2] and the methods used by Ma et al. [3] and Yao et al. [4].

Figure S1B provides the result of the two-stage Metropolis search. In the left panel the priming sets obtained from the first stage form three main clusters under the K-means Clustering. For visualization purpose the clusters in the high-dimensional parameter space are plotted using the first two components of Principal Component Analysis. Using the Khachiyan Algorithm [5], we calculated the minimal volume ellipsoid to embrace 99% of the parameter sets of each region. As shown in the right panel of Figure 1B which calculates the distance of a parameter set to the center of each bounding ellipsoid, it turns out that a single ellipsoid embraces clusters 1 and 2, thus forming one single region (we call it “Region I”). This result is independently confirmed with the following Metropolis simulation with  $\rho = 0$ : a trajectory starting from one cluster can generate parameter sets belonging to the other cluster. On the other hand, cluster 3 forms a separate region (Region II). Notice that a small portion of samples locate within both ellipsoids, indicating these two ellipsoids (regions) are barely connected. We found that Region II is actually (part of) the mirror image of Region I with the roles of  $x_1$  and  $x_2$  exchanged, reflecting the symmetry of the 3-node system. Therefore, the results discussed below and in the main text focus on the motifs found in Region I.

About  $10^6$  output samples are generated out of  $10^8$  Metropolis steps in stage 2. Of these  $10^6$  samples, some appear to be biologically irrelevant and are removed from the sample set. For example, in some cases  $x_3(t)$  increases to a much higher level after the HD stimulation is removed, this would be a pathological response of the system. Other samples show unrealistically large sensitivity to initial conditions, i.e., although LD induced only small changes in  $x_1$ ,  $x_2$  and  $x_3$  (less than 10%), the system still exhibited priming effect. If priming were due to such small differences, then (in our opinion) the response would not be robust to the stochastic fluctuation expected in real systems [6-9].

While the results reported in the main text are from one trajectory result, the procedure was repeated several times with random initial start of the searching in stage 1. Results analyzed from different trajectories agree with each other, confirming the convergence of our two-stage Metropolis searching procedure.

### **Statistical method used to identify backbone motifs**

A backbone motif is defined to be the simplest motif (the fewest number of non-zero  $\omega_{ji}$ 's) that is shared by most of the priming/tolerance network structures in a particular region. A backbone motif must be able to generate a priming/tolerance effect by itself. Identification of backbone motifs helps to define the core mechanism of priming or tolerance. Figure S3 shows the statistical method used to obtain the backbone motifs for the pathway synergy group.

Step 1: calculate the mean of each interaction coefficient  $\omega_{ji}$  among all samples of the group, and map the mean values into a topological matrix  $\tau_{ji}$  (see Material and methods in the main text for the method of parameter discretization).

Step 2: for each  $\omega_{ji}$  calculate its coefficient of variation (CV = standard deviation divided by |mean|). The value of CV measures the dispersion of the data along each parameter dimension. A large value of CV suggests that a link is not essential and should not be part of the backbone motif. Only links with  $CV < CutOff$  should be part of a backbone motif. For  $CV > CutOff$ ,  $\tau_{ji} = 0$  in the backbone motif.

Step 2.1: determine the optimal value of *CutOff*. As *CutOff* decreases, the corresponding motif becomes simpler and therefore more samples contain this motif. However, the motif is a backbone motif only if it gives priming by itself. Therefore, there exists an optimal *CutOff* value so that the corresponding motif has the simplest topology that is still able to generate priming for some specific parameter sets. In this case the optimal *CutOff* = 0.54 (see the right figure in Step 2.1 of Supplement Figure 3).

Step 2.2: compare each dimension in the CV matrix to this optimal *CutOff* value, and obtain the corresponding backbone motif.

Figure S4 shows 2D histograms of parameter distributions under each priming mechanism (PS, SD and AI). These histograms clearly highlight the corresponding backbone motifs. For example, for the 2D histogram shown in Supplemental Figure 4A, the PS data form clusters where both  $x_1$  and  $x_2$  activate  $x_3$  (2<sup>nd</sup> figure), and  $x_3$  feeds back negatively on  $x_2$  (4<sup>th</sup> figure). Also  $x_2$  shows significant auto-activation but  $x_1$  does not (data spread out horizontally in the 5<sup>th</sup> figure); this is in line with the backbone motif where  $x_1$  auto-regulation is not essential for priming. Similarly,  $x_1$  exerts strong inhibition on  $x_2$ , whereas the regulation from  $x_2$  to  $x_1$  can be either negative, zero or positive (the 3<sup>rd</sup> figure), in line with the backbone motif where this regulation is missing. In addition, the 1<sup>st</sup> figure indicates that  $x_1$  should change on a much faster time-scale than  $x_2$ . This is a dynamical requirement of pathway synergy in addition to the topological features as illustrated by the backbone motif.

### **Motif density is more robust than frequency to variation in the topological cut-off**

To map from the continuous space of interaction coefficients  $\omega_{ji}$  to the discrete space of network topologies  $\tau_{ji}$ , one must choose a cut-off value  $\tau_0$  for mapping  $\omega_{ji}$ 's to  $-1$ ,  $0$  or  $+1$ . We have chosen this cut-off  $\tau_0$  (somewhat arbitrarily) to be  $0.1$ . The simplest way to order these topologies from “more robust” to “less robust” is in terms of the number of parameter sets that map into each topology, i.e., the frequency of each topology in the total data set. However, we find that topology-frequency is sensitive to the choice of the cut-off value for  $\omega_{ji}$ . A better measure is topology density (Figure S6), defined as follows. The total volume of the 9-dimensional space of interaction coefficients is  $2^9$ , because each  $\omega_{ji}$  can continuously vary over  $[-1, 1]$ . For a motif with  $m$  non-zero  $\tau_{ji}$ 's, the volume of its subspace is  $(1 - \tau_0)^m = (0.9)^m$ . The density of the motif is defined as the number of samples corresponding to this motif divided by the volume of its subspace.

In Supplemental Figure 6 we compared the two ways of ordering the topologies using the SD data set as an example. The figure shows how the rank of robustness of each topology changes due to 10%, 30% and 50% positive or negative variations from the original cut-off  $\tau_0 = 0.1$ . A point on the figure with coordinate  $(x, y)$  means that the rank of a given topology is  $x$  with  $\tau_0 = 0.1$ , but  $y$  with the varied  $\tau_0$ . Scattering from the diagonal indicates changing of the ranking due to  $\tau_0$  variation. The density-sorted rank (top panel) is less sensitive than the frequency-sorted one (lower panel) to the change of  $\tau_0$ .

## 2D parameter correlations demonstrate how parameter compensation affects topological robustness

We calculated the correlation matrix of each priming mechanism from the corresponding samples. As can be seen from Figure S8A, some parameters show strong anti-correlations. For a pair of anti-correlated parameters, increasing one can be compensated by decreasing the other (or negatively increasing the other if the regulation is inhibition), so the overall dynamics remains (approximately) the same. This is because in the modeling equations,

$$\frac{dx_j(t)}{dt} = \gamma_j \left( \frac{1}{1 + e^{-\sigma_j W_j}} - x_j(t) \right)$$

$$W_j = \sum_{i=1}^3 \omega_{ji} x_i(t) + \omega_{j0} + S_j$$

the activation of species  $x_j$  is dependent on the overall net input  $W_j$ . As  $W_j$  sums inputs from all regulating nodes, a change in one parameter (e.g.  $\omega_{j1}$ ) can be compensated by a change in a second parameter (e.g.  $\omega_{j2}$ ) if the sum stays the same. Such parameter compensation expands the region of parameter space where priming or tolerance is observed and therefore affects the robustness of the model.

For example, the left panel of Supplemental Figure 8B shows that the feedback from  $x_3$  to  $x_2$  strongly anti-correlated with  $x_2$ 's auto-regulation among SD datasets. With  $\omega_{23} = 0$ , the absolute value of  $\omega_{22}$  needs to be also small (the Null region in the right panel of Figure 8B), otherwise priming is abolished. However, since  $\omega_{23}$  and  $\omega_{22}$  are anti-correlated, the effect of an increasing  $\omega_{22}$  can be canceled off by increasing  $\omega_{23}$ , thus expand the priming region in the parameter space (the upper left and bottom right regions of the right panel of Figure S8B).

## Supporting References

1. Metropolis N, Rosenbluth AW, Rosenbluth MN, Teller AH (1953) Equation of State Calculations by Fast Computing Machines. *The Journal of chemical physics* 21: 1087.
2. Singhania R (2011) Modeling Protein Regulatory Networks that Control Mammalian Cell Cycle Progression and that Exhibit Near-Perfect Adaptive Responses. Blacksburg, Va: University Libraries: Virginia Polytechnic Institute and State University.
3. Ma W, Trusina A, El-Samad H, Lim WA, Tang C (2009) Defining Network Topologies that Can Achieve Biochemical Adaptation. *Cell* 138: 760-773.
4. Yao G, Tan CM, West M, Nevins JR, You LC (2011) Origin of bistability underlying mammalian cell cycle entry. *Mol Sys Biol* 7: 485.
5. Khachiyan LG (1996) Rounding of Polytopes in the Real Number Model of Computation. *Math Oper Res* 21: 307-320.
6. Spencer SL, Gaudet S, Albeck JG, Burke JM, Sorger PK (2009) Non-genetic origins of cell-to-cell variability in TRAIL-induced apoptosis. *Nature* 459: 428-432.
7. Sigal A, Milo R, Cohen A, Geva-Zatorsky N, Klein Y, et al. (2006) Variability and memory of protein levels in human cells. *Nature* 444: 643-646.
8. Cohen AA, Geva-Zatorsky N, Eden E, Frenkel-Morgenstern M, Issaeva I, et al. (2008) Dynamic proteomics of individual cancer cells in response to a drug. *Science* 322: 1511-1516.
9. Chang HH, Hemberg M, Barahona M, Ingber DE, Huang S (2008) Transcriptome-wide noise controls lineage choice in mammalian progenitor cells. *Nature* 453: 544-547.
